# Supplementary material for: Amphibian (Xenopus laevis) Tadpoles and Adult Frogs Differ in Their Use of Expanded Repertoires of Type I and Type III Interferon Cytokines
Source: MDPI journal article supplement (doi:10.3390/v10070372), 2018-07-17
Supplement: s1 [file s1]

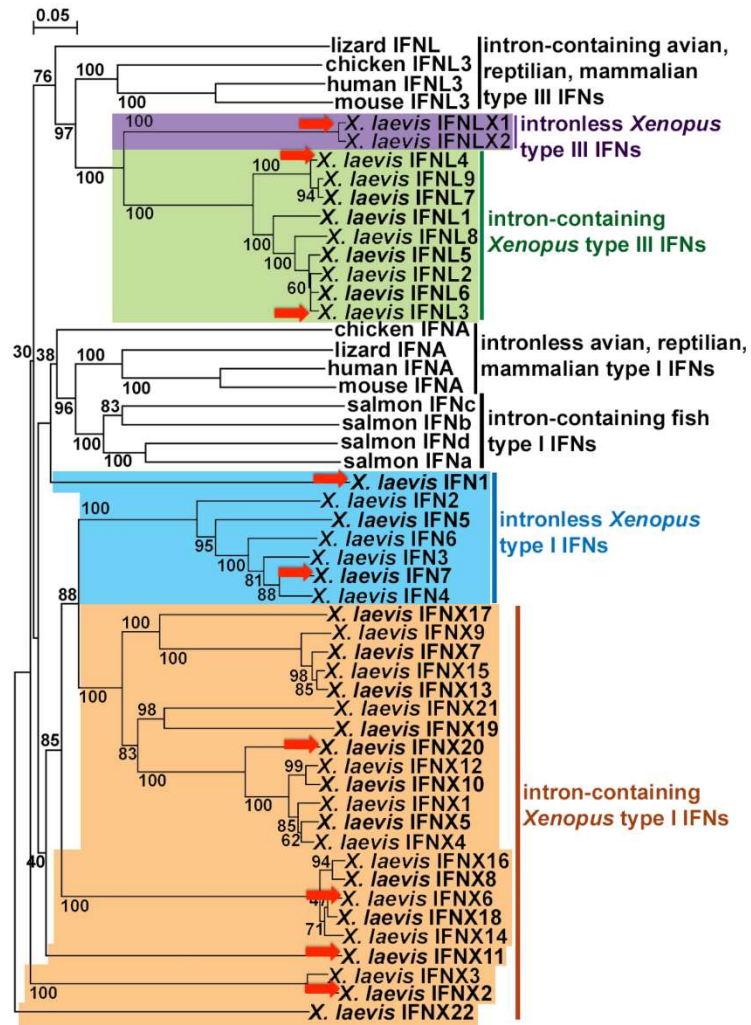

**Supplemental Figure S1.** The phylogenetic tree was constructed using the neighbor joining method and bootstrapped 10,000 times (denoted as %). The *X. laevis* IFNs chosen for gene expression analyses are indicated by arrows.
